# Supplementary material
Source: PubMed Central journal article supplement (PMC5559319)
Supplement: NIHMS873574-supplement-2.pdf [file NIHMS873574-supplement-2.pdf]

# Supplementary Table S1

**Supplementary Table S1.** Breast cancer cell lines' molecular receptor status and TNBC subtype classification.

| Cell line  | Receptor status |    |      | TNBC subtype |
|------------|-----------------|----|------|--------------|
|            | ER              | PR | HER2 |              |
| HCC1806    | -               | -  | -    | BL           |
| HCC1937    | -               | -  | -    | BL           |
| HCC3153    | -               | -  | -    | BL           |
| HCC70      | -               | -  | -    | BL           |
| MDA-MB-468 | -               | -  | -    | BL           |
| SUM149PT * | -               | -  | -    | BL           |
| MDA-MB-453 | -               | -  | -    | LAR          |
| SUM185PT   | -               | -  | -    | LAR          |
| BT-549     | -               | -  | -    | M            |
| Hs578T     | -               | -  | -    | M            |
| MDA-MB-157 | -               | -  | -    | M            |
| MDA-MB-231 | -               | -  | -    | M            |
| MDA-MB-436 | -               | -  | -    | M            |
| SUM159PT   | -               | -  | -    | M            |
| IBC-3 *    | -               | -  | +    | N/A          |
| KPL-4 *    | -               | -  | +    | N/A          |
| SUM190PT * | -               | -  | +    | N/A          |

**Supplementary Table S1. Breast cancer cell lines' molecular receptor status and TNBC subtype classification.**

Sources for molecular receptor status, TNBC subtypes, and IBC classification: Asterand Bioscience, Inc., 32-34. ER: estrogen receptor; PR: progesterone receptor; HER2: Human epidermal growth factor receptor 2; BL: basal-like; M: mesenchymal; LAR: luminal androgen receptor; +, positive status; -, negative status; \*, IBC diagnosis; N/A, not applicable.

# Supplementary Table S2

**Supplementary Table S2.** Effect of entinostat on the expression of apoptosis-related gene pathways.

| Gene symbol | Description                                                | SUM149PT           | SUM190PT           |
|-------------|------------------------------------------------------------|--------------------|--------------------|
|             |                                                            | Fold-change (log2) | Fold-change (log2) |
| BCL2A1      | BCL2-related protein A1                                    | 4.63               | 0.41               |
| TNFRSF10B   | tumor necrosis factor receptor superfamily, member 10b     | 0.98               | 1.68               |
| TNFRSF9     | tumor necrosis factor receptor superfamily, member 9       | 3.28               | 1.30               |
| BIRC3       | baculoviral IAP repeat-containing 3                        | 2.95               | 3.80               |
| BCL2L2      | BCL2-like 2                                                | -0.78              | -1.22              |
| CASP4       | caspase 4, apoptosis-related cysteine peptidase            | 1.41               | 0.91               |
| PMAIP1      | phorbol-12-myristate-13-acetate-induced protein 1          | 1.73               | 4.26               |
| BRAF        | v-raf murine sarcoma viral oncogene homolog B1             | 0.90               | 0.59               |
| SP1         | Sp1 transcription factor                                   | -0.75              | -0.49              |
| NOL3        | nucleolar protein 3 (apoptosis repressor with CARD domain) | -1.55              | -1.74              |
| CFLAR       | CASP8 and FADD-like apoptosis regulator                    | -0.63              | -0.67              |
| TP53BP2     | tumor protein p53 binding protein, 2                       | 0.82               | 1.00               |
| TNFRSF10A   | tumor necrosis factor receptor superfamily, member 10a     | -0.81              | -0.25              |
| BCL10       | B-cell CLL/lymphoma 10                                     | 0.77               | 0.40               |
| TP53        | tumor protein p53                                          | -2.33              | -0.67              |
| RIPK2       | receptor-interacting serine-threonine kinase 2             | 0.84               | 0.52               |
| XIAP        | X-linked inhibitor of apoptosis                            | -0.53              | -0.31              |
| LTBR        | lymphotoxin beta receptor (TNFR superfamily, member 3)     | -0.52              | -0.86              |
| TNFSF10     | tumor necrosis factor (ligand) superfamily, member 10      | 0.83               | -1.21              |
| HDAC1       | histone deacetylase 1                                      | 0.26               | 1.86               |
| MAPK1       | mitogen-activated protein kinase 1                         | 0.17               | 0.29               |
| BCL2L11     | BCL2-like 11 (apoptosis facilitator)                       | 0.67               | 1.08               |
| CASP3       | caspase 3, apoptosis-related cysteine peptidase            | -0.74              | 0.68               |
| AKT1        | v-akt murine thymoma viral oncogene homolog 1              | -0.74              | -1.30              |
| IGF1R       | insulin-like growth factor 1 receptor                      | 0.44               | -0.33              |
| BID         | BH3 interacting domain death agonist                       | -0.74              | -0.70              |
| MCL1        | myeloid cell leukemia sequence 1 (BCL2-related)            | 0.44               | 0.39               |
| BAG1        | BCL2-associated athanogene                                 | -0.70              | -0.66              |

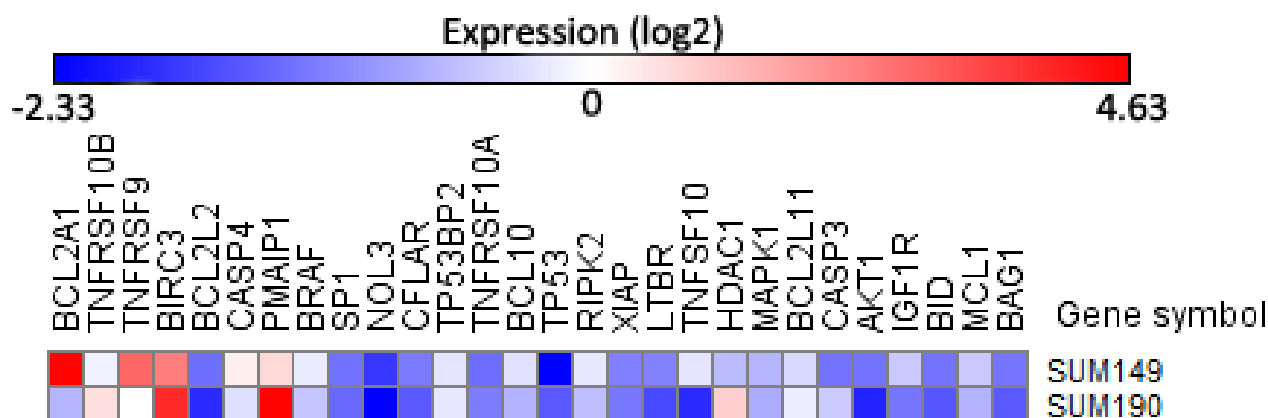

**Supplementary Table S2. Effect of entinostat on the expression of apoptosis-related gene pathways.**

The expression profile of apoptosis-related genes for SUM149PT and SUM190PT cell lines after entinostat treatment for 48 hours. Results are represented as the fold-change of the log<sub>2</sub> values of entinostat treated cells in comparison to the values observed in non-treated cells. GENE-E software (The Broad Institute, Cambridge, MA) was utilized for heat map visualization of gene expression data.
